# Supplementary material for: Modulation in structural and electronic properties of 2D Ga2O3 by chemical passivation
Source: Royal Society of Chemistry journal article supplement (doi:10.1039/d0tc03279d), 2020-01-01
Supplement: d0tc03279d1.pdf [file d0tc03279d1.pdf]

## Supplementary Information

### Modulation in structural and electronic properties of 2D Ga<sub>2</sub>O<sub>3</sub> by chemical passivation

Linpeng Dong,<sup>\*a</sup> Shun Zhou,<sup>a</sup> Lei Gong,<sup>a</sup> Wei Wang,<sup>a</sup> Lichun Zhang,<sup>b</sup> Chuanlu Yang,<sup>b</sup> Jianhui Yu,<sup>\*c</sup> and Weiguo Liu<sup>a</sup>

<sup>a</sup>Shaanxi Province Key Laboratory of Thin Films Technology & Optical Test, Xi'an Technological University, Xi'an, 710032, China.

<sup>b</sup>School of Physics and Optoelectronics Engineering, Ludong University, Yantai, 26425, China

<sup>c</sup>Key Laboratory of Optoelectronic Information and Sensing Technologies of Guangdong Higher Education Institutes, Department of Optoelectronic Engineering, Jinan University, Guangzhou, 510632, China.

\*Corresponding authors: [lpdong@xatu.edu.cn](mailto:lpdong@xatu.edu.cn), [jianhuiyu@jnu.edu.cn](mailto:jianhuiyu@jnu.edu.cn)

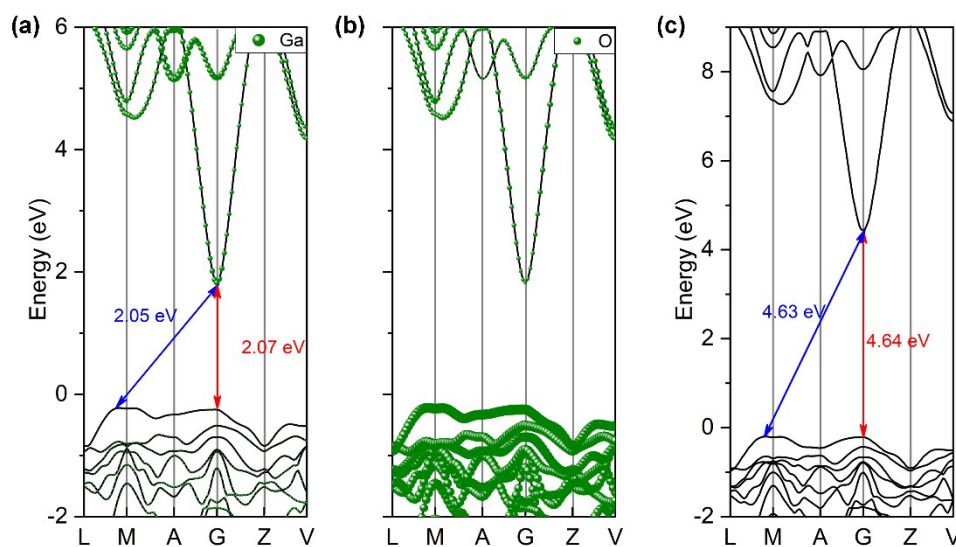

**Fig. S1** Band structures of the bulk  $\beta$ -Ga<sub>2</sub>O<sub>3</sub> calculated by PBE (a), (b) and HSE06 functional

(c)

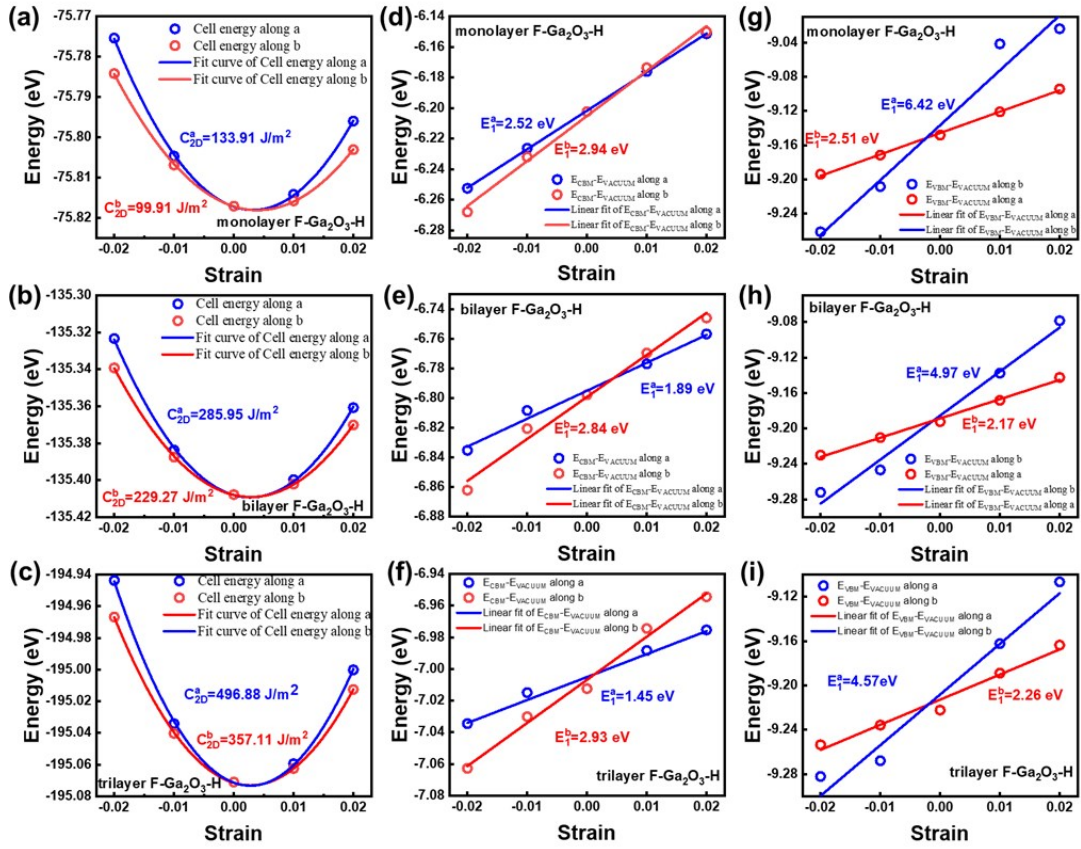

**Fig. S2** Energy-strain relationship along a and b directions for monolayer (a), bilayer (b), and (c) trilayer 2D F-Ga<sub>2</sub>O<sub>3</sub>-H. Shifts of conduction band and valence band under uniaxial strain for 2D F-Ga<sub>2</sub>O<sub>3</sub>-H with different layers: (d) and (g) monolayer, (e) and (h) bilayer, (e) and (h) trilayer.

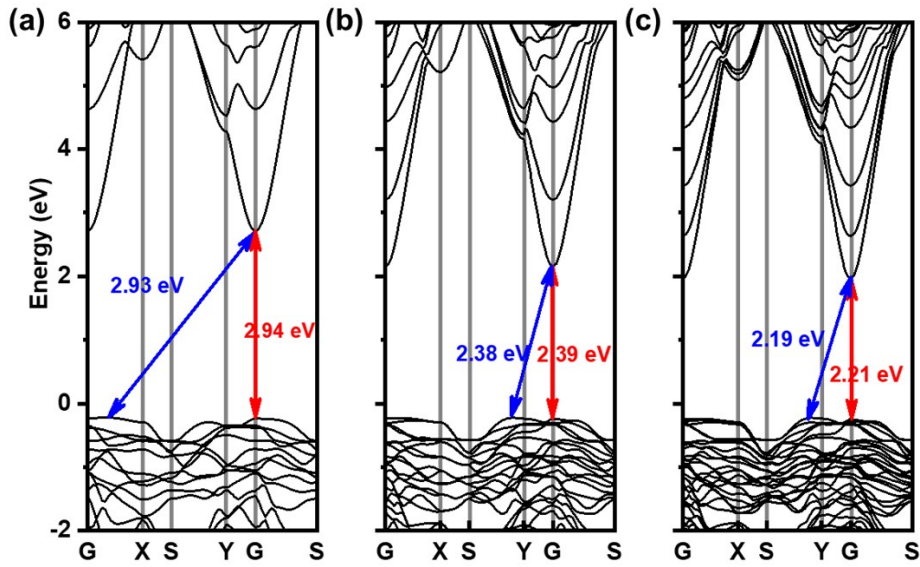

**Fig. S3** Band structures of 2D F-Ga<sub>2</sub>O<sub>3</sub>-H with different layers: (a) monolayer, (b) bilayer, (c)

trilayer
